# Supplementary material for: Intracranial Efficacy of Selpercatinib in RET Fusion-Positive Non–Small Cell Lung Cancers on the LIBRETTO-001 Trial
Source: Oxford University Press journal article supplement (doi:10.1158/1078-0432.ccr-21-0800), 2021-06-04
Supplement: 10780432ccr210800-sup-261668_2_supp_7108336_qsznjf.pdf [file 10780432ccr210800-sup-261668_2_supp_7108336_qsznjf.pdf]

**Table S3. Intracranial tumor response by prior CNS radiotherapy as assessed by independent review committee.** Tumor response of patients with *RET* fusion-positive NSCLC and non-measurable intracranial disease is shown by prior CNS radiotherapy status.

|                                             | Patients with <i>RET</i> fusion-positive NSCLC and non-measurable CNS disease |                                                |                                                          |
|---------------------------------------------|-------------------------------------------------------------------------------|------------------------------------------------|----------------------------------------------------------|
|                                             | All patients (N=58)                                                           | Patients without prior CNS radiotherapy (N=21) | Patients with prior CNS radiotherapy (N=37) <sup>a</sup> |
| Intracranial objective response rate, n (%) | 20 (34)                                                                       | 11 (52)                                        | 9 (24)                                                   |
| 95% confidence interval <sup>b</sup>        | 23–48                                                                         | 30–74                                          | 12–41                                                    |
| Intracranial best overall response, n (%)   |                                                                               |                                                |                                                          |
| Complete response                           | 20 (34)                                                                       | 11 (52)                                        | 9 (24)                                                   |
| Non-CR/Non-PD                               | 29 (50)                                                                       | 6 (29)                                         | 23 (62)                                                  |
| Progressive disease                         | 5 (9)                                                                         | 1 (5)                                          | 4 (11)                                                   |
| Non evaluable                               | 2 (3)                                                                         | 2 (10)                                         | 0                                                        |
| Undefined <sup>c</sup>                      | 2 (3)                                                                         | 1 (5)                                          | 1 (3)                                                    |

Abbreviations: CNS, central nervous system; CR, complete response; PD, progressive disease

<sup>a</sup> Of the 37 patients who received prior radiotherapy, 27 completed radiotherapy >2 months prior to treatment.

<sup>b</sup> 95% confidence interval was calculated using Clopper-Pearson method.

<sup>c</sup> Patients were assessed by investigator as having non-target brain lesion at baseline, but no disease was identified by IRC.

Note: CR and non-CR/non-PD corresponds to the clinical benefit rate for non-measurable intracranial disease.
