# Supplementary material for: Intracranial Efficacy of Selpercatinib in RET Fusion-Positive Non–Small Cell Lung Cancers on the LIBRETTO-001 Trial
Source: PubMed Central journal article supplement — Clin Cancer Res. 2021 Jun 4;27(15):4160–7. doi: 10.1158/1078-0432.CCR-21-0800 (PMC8447251; doi:10.1158/1078-0432.ccr-21-0800), 2021-06-04
Supplement: NIHMS1714118-supplement-1.pdf [file NIHMS1714118-supplement-1.pdf]

## **ONLINE SUPPLEMENT**

### **Intracranial efficacy of selpercatinib in RET fusion-positive non-small cell lung cancers on the LIBRETTO-001 trial**

**Vivek Subbiah et al.**

#### **LIBRETTO-001 Investigators**

B Solomon, B Robinson, J Laskin, K Staal Rohrberg, B Besse, A Italiano, P Tomasini, P Cassier, J Medioni, J Wolf, M Kroiss, HHF Loong, N Peled, T Golan, H Nechushtan, F de Braud, K Goto, Y Ohe, M Nishio, H Kenmotsu, H Daga, M Satouchi, R Toyozawa, M Morise, S Takeuchi, M Takeda, T Sakamoto, K Ohashi, J Sakakibara, DSW Tan, K Park, J-Y Han, YJ Kim, BC Cho, DH Lee, V Boni, V Moreno Garcia, E Garralda Cabanas, O Gautschi, JC-H Yang, G-C Chang, A Minchom, A Drilon, T Bauer, V Subbiah, L Bazhenova, M Shah, C McCoach, N Lakhani, N Pennell, L Wirth, C Bestvina, G Oxnard, E Massarelli, G Falchook, J Goldman, J Weiss, B Levy, F Worden, W Akerley, J Vuky, T Owonikoko, J Berlin, A Spira, M Matrana, J Morris, L Raez, M Burkard, V Zhu, S Waqar, M Brose, F Wilson, SMA Khan, G Dy, C Rolfo, V Velcheti, N Karlin, V Bernet, M-G Pan, J Suga
