# Supplementary material for: Intracranial Efficacy of Selpercatinib in RET Fusion-Positive Non–Small Cell Lung Cancers on the LIBRETTO-001 Trial
Source: PubMed Central journal article supplement — Clin Cancer Res. 2021 Jun 4;27(15):4160–7. doi: 10.1158/1078-0432.CCR-21-0800 (PMC8447251; doi:10.1158/1078-0432.ccr-21-0800), 2021-06-04
Supplement: NIHMS1714118-supplement-2.pdf [file NIHMS1714118-supplement-2.pdf]

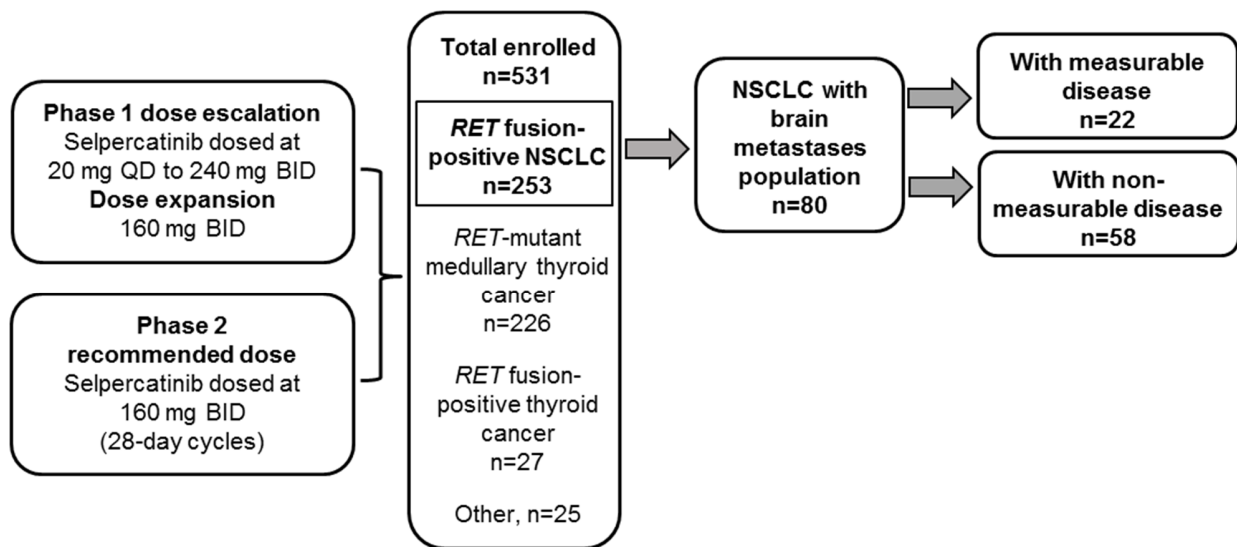

**Figure S1. Trial profile.** The schematic depicts the derivation of the LIBRETTO-001 trial population of patients with *RET* fusion-positive NSCLC and baseline intracranial metastases on which these analyses are based. The figure depicts enrollment through June 17, 2019. Patients included in this population were followed for a minimum of 6 months; the data cutoff date was Dec 16, 2019. Abbreviations: BID, twice daily; NSCLC, non-small-cell lung cancer; QD, once daily
