# Supplementary material for: Intracranial Efficacy of Selpercatinib in RET Fusion-Positive Non–Small Cell Lung Cancers on the LIBRETTO-001 Trial
Source: PubMed Central journal article supplement — Clin Cancer Res. 2021 Jun 4;27(15):4160–7. doi: 10.1158/1078-0432.CCR-21-0800 (PMC8447251; doi:10.1158/1078-0432.ccr-21-0800), 2021-06-04
Supplement: NIHMS1714118-supplement-3.pdf [file NIHMS1714118-supplement-3.pdf]

**Table S1. Treatment and study disposition.**

| Status                                                                           | All patients with <i>RET</i> fusion-positive NSCLC and intracranial metastases (N=80) |
|----------------------------------------------------------------------------------|---------------------------------------------------------------------------------------|
| <b>Starting selpercatinib dose, n (%)</b>                                        |                                                                                       |
| 20 mg BID                                                                        | 1 (1.3)                                                                               |
| 40 mg BID                                                                        | 4 (5.0)                                                                               |
| 60 mg BID                                                                        | 1 (1.3)                                                                               |
| 80 mg BID                                                                        | 2 (2.5)                                                                               |
| 120 mg BID                                                                       | 6 (7.5)                                                                               |
| 160 mg BID <sup>a</sup>                                                          | 65 (81.3)                                                                             |
| 240 mg BID                                                                       | 1 (1.3)                                                                               |
| <b>Subjects who received at least one dose of 160 mg BID, n (%) <sup>a</sup></b> |                                                                                       |
| Starting dose of 160 mg BID                                                      | 65 (81.3)                                                                             |
| Intra-patient dose escalated to 160 mg BID                                       | 10 (12.5)                                                                             |
| Dose reduced to 160 mg BID                                                       | 1 (1.3)                                                                               |
| <b>Treatment continued post-progression, n (%) <sup>b</sup></b>                  |                                                                                       |
| <b>Treatment status, n (%)</b>                                                   |                                                                                       |
| Discontinued                                                                     | 34 (42.5)                                                                             |
| Continuing                                                                       | 46 (57.5)                                                                             |
| <b>Reason treatment discontinued, n (%)</b>                                      |                                                                                       |
| Progressive disease <sup>b</sup>                                                 | 23 (28.8)                                                                             |
| Adverse event                                                                    | 6 (7.5)                                                                               |
| Withdrawal of consent                                                            | 2 (2.5)                                                                               |
| Death                                                                            | 3 (3.8)                                                                               |
| <b>Study status, n (%)</b>                                                       |                                                                                       |
| Discontinued                                                                     | 23 (28.8)                                                                             |
| Continuing                                                                       | 57 (71.3)                                                                             |
| <b>Reason study discontinued, n (%)</b>                                          |                                                                                       |
| Withdrawal of consent                                                            | 8 (10.0)                                                                              |
| Death                                                                            | 15 (18.8)                                                                             |
| <b>Time on treatment (months)</b>                                                |                                                                                       |
| N                                                                                | 80                                                                                    |
| Mean                                                                             | 10.9                                                                                  |
| Standard deviation                                                               | 6.3                                                                                   |
| Median                                                                           | 10.5                                                                                  |
| Minimum                                                                          | 0.2                                                                                   |
| Maximum                                                                          | 27.8                                                                                  |
| <b>Time on study (months)</b>                                                    |                                                                                       |
| N                                                                                | 80                                                                                    |
| Mean                                                                             | 11.6                                                                                  |
| Standard deviation                                                               | 6.2                                                                                   |
| Median                                                                           | 11.1                                                                                  |
| Minimum                                                                          | 0.4                                                                                   |
| Maximum                                                                          | 27.8                                                                                  |

<sup>a</sup> 160 mg BID is the recommended phase 2 dose.<sup>b</sup> Any progressive disease, not limited to intracranial metastases progression.
