# Supplementary material for: Intracranial Efficacy of Selpercatinib in RET Fusion-Positive Non–Small Cell Lung Cancers on the LIBRETTO-001 Trial
Source: PubMed Central journal article supplement — Clin Cancer Res. 2021 Jun 4;27(15):4160–7. doi: 10.1158/1078-0432.CCR-21-0800 (PMC8447251; doi:10.1158/1078-0432.ccr-21-0800), 2021-06-04
Supplement: NIHMS1714118-supplement-4.pdf [file NIHMS1714118-supplement-4.pdf]

**Table S2. Intracranial tumor response by prior CNS radiotherapy as assessed by independent review committee.** Tumor response of patients with *RET* fusion-positive NSCLC and measurable intracranial disease is shown by prior CNS radiotherapy status.

|                                             | Patients with <i>RET</i> fusion-positive NSCLC and measurable CNS disease |                                                |                                                         |
|---------------------------------------------|---------------------------------------------------------------------------|------------------------------------------------|---------------------------------------------------------|
|                                             | All patients (N=22)                                                       | Patients without prior CNS radiotherapy (N=14) | Patients with prior CNS radiotherapy (N=8) <sup>a</sup> |
| Intracranial objective response rate, n (%) | 18 (82)                                                                   | 12 (86)                                        | 6 (75)                                                  |
| 95% confidence interval <sup>b</sup>        | 60–95                                                                     | 57–98                                          | 35–97                                                   |
| Intracranial best overall response, n (%)   |                                                                           |                                                |                                                         |
| Complete response                           | 5 (23)                                                                    | 4 (29)                                         | 1 (13)                                                  |
| Partial response                            | 13 (59)                                                                   | 8 (57)                                         | 5 (63)                                                  |
| Stable disease                              | 4 (18)                                                                    | 2 (14)                                         | 2 (25)                                                  |
| Progressive disease                         | 0                                                                         | 0                                              | 0                                                       |

Abbreviations: CNS, central nervous system

<sup>a</sup> Of the 8 patients who received prior radiotherapy, 6 completed radiotherapy >2 months prior to treatment.

<sup>b</sup> 95% confidence interval was calculated using Clopper-Pearson method.
