# Supplementary material for: Intracranial Efficacy of Selpercatinib in RET Fusion-Positive Non–Small Cell Lung Cancers on the LIBRETTO-001 Trial
Source: PubMed Central journal article supplement — Clin Cancer Res. 2021 Jun 4;27(15):4160–7. doi: 10.1158/1078-0432.CCR-21-0800 (PMC8447251; doi:10.1158/1078-0432.ccr-21-0800), 2021-06-04
Supplement: NIHMS1714118-supplement-6.pdf [file NIHMS1714118-supplement-6.pdf]

**Table S4. Total treatment-emergent and treatment-related adverse events of any grade occurring in selpercatinib-treated patients with *RET* fusion-positive NSCLC with and without intracranial metastases.**

|                                      | Treatment-emergent AEs, n (%) <sup>a</sup>                           |                                           | Treatment-related AEs, n (%) <sup>b</sup>                            |                                           |
|--------------------------------------|----------------------------------------------------------------------|-------------------------------------------|----------------------------------------------------------------------|-------------------------------------------|
|                                      | Pts with <i>RET</i> fusion+ NSCLC and intracranial metastases (N=80) | Pts with <i>RET</i> fusion+ NSCLC (N=253) | Pts with <i>RET</i> fusion+ NSCLC and intracranial metastases (N=80) | Pts with <i>RET</i> fusion+ NSCLC (N=253) |
| Diarrhoea                            | 38 (48)                                                              | 111 (44)                                  | 21 (26)                                                              | 66 (26)                                   |
| Dry mouth                            | 38 (48)                                                              | 102 (40)                                  | 35 (44)                                                              | 91 (36)                                   |
| Alanine aminotransferase increased   | 31 (39)                                                              | 78 (31)                                   | 25 (31)                                                              | 65 (26)                                   |
| Aspartate aminotransferase increased | 31 (39)                                                              | 85 (34)                                   | 23 (29)                                                              | 69 (27)                                   |
| Hypertension                         | 28 (35)                                                              | 83 (33)                                   | 18 (23)                                                              | 54 (21)                                   |
| Fatigue                              | 25 (31)                                                              | 65 (26)                                   | 13 (16)                                                              | 33 (13)                                   |
| Thrombocytopenia                     | 21 (26)                                                              | 46 (18)                                   | 15 (19)                                                              | 33 (13)                                   |
| Nausea                               | 20 (25)                                                              | 61 (24)                                   | 5 (6)                                                                | 20 (8)                                    |
| Pyrexia                              | 20 (25)                                                              | 53 (21)                                   | 6 (8)                                                                | 16 (6)                                    |
| Rash                                 | 20 (25)                                                              | 56 (22)                                   | 15 (19)                                                              | 38 (15)                                   |
| Constipation                         | 17 (21)                                                              | 55 (22)                                   | 9 (11)                                                               | 20 (8)                                    |
| Cough                                | 16 (20)                                                              | 45 (18)                                   | 1 (1)                                                                | 3 (1)                                     |
| Urinary tract infection              | 16 (20)                                                              | 36 (14)                                   | 0                                                                    | 1 (0.4)                                   |
| Insomnia                             | 15 (19)                                                              | 29 (11)                                   | 1 (1)                                                                | 1 (0.4)                                   |
| Oedema peripheral                    | 15 (19)                                                              | 65 (26)                                   | 9 (11)                                                               | 35 (14)                                   |
| Headache                             | 14 (18)                                                              | 51 (20)                                   | 1 (1)                                                                | 11 (4)                                    |
| Dizziness                            | 13 (16)                                                              | 34 (13)                                   | 0                                                                    | 11 (4)                                    |
| Dyspnoea                             | 13 (16)                                                              | 41 (16)                                   | 1 (1)                                                                | 4 (2)                                     |
| Hyponatraemia                        | 13 (16)                                                              | 25 (10)                                   | 1 (1)                                                                | 2 (1)                                     |
| Decreased appetite                   | 12 (15)                                                              | 33 (13)                                   | 3 (4)                                                                | 16 (6)                                    |
| Electrocardiogram QT prolonged       | 12 (15)                                                              | 43 (17)                                   | 9 (11)                                                               | 31 (12)                                   |
| Hypomagnesaemia                      | 12 (15)                                                              | 28 (11)                                   | 5 (6)                                                                | 7 (3)                                     |
| Vomiting                             | 12 (15)                                                              | 44 (17)                                   | 0                                                                    | 7 (3)                                     |

Abbreviations: AE, adverse event; NSCLC, non-small cell lung cancer; pts, patients

<sup>a</sup> The adverse events listed here are those that occurred in  $\geq 15\%$  of patients with NSCLC and intracranial metastases at any grade level, independent of attribution.

<sup>b</sup> The relatedness of adverse events to treatment was determined by the investigators.
