# Supplementary material for: Intracranial Efficacy of Selpercatinib in RET Fusion-Positive Non–Small Cell Lung Cancers on the LIBRETTO-001 Trial
Source: PubMed Central journal article supplement — Clin Cancer Res. 2021 Jun 4;27(15):4160–7. doi: 10.1158/1078-0432.CCR-21-0800 (PMC8447251; doi:10.1158/1078-0432.ccr-21-0800), 2021-06-04
Supplement: NIHMS1714118-supplement-7.pdf [file NIHMS1714118-supplement-7.pdf]

**Table S5. Treatment-emergent and treatment-related adverse events occurring in selpercatinib-treated patients with *RET* fusion-positive NSCLC and intracranial disease.**

|                                      | Patients with <i>RET</i> fusion+ NSCLC and intracranial metastases (N=80) |         |         |         |         |                                                      |         |         |         |         |
|--------------------------------------|---------------------------------------------------------------------------|---------|---------|---------|---------|------------------------------------------------------|---------|---------|---------|---------|
|                                      | Treatment-emergent adverse events, n (%) <sup>a</sup>                     |         |         |         |         | Treatment-related adverse events, n (%) <sup>b</sup> |         |         |         |         |
|                                      | Grade 1                                                                   | Grade 2 | Grade 3 | Grade 4 | Total   | Grade 1                                              | Grade 2 | Grade 3 | Grade 4 | Total   |
| Diarrhoea                            | 28 (35)                                                                   | 7 (9)   | 3 (4)   | 0       | 38 (48) | 16 (20)                                              | 3 (4)   | 2 (3)   | 0       | 21 (26) |
| Dry mouth                            | 32 (40)                                                                   | 6 (8)   | 0       | 0       | 38 (48) | 30 (38)                                              | 5 (6)   | 0       | 0       | 35 (44) |
| Alanine aminotransferase increased   | 15 (19)                                                                   | 2 (3)   | 12 (15) | 2 (3)   | 31 (39) | 12 (15)                                              | 2 (3)   | 10 (13) | 1 (1)   | 25 (31) |
| Aspartate aminotransferase increased | 12 (15)                                                                   | 10 (13) | 8 (10)  | 1 (1)   | 31 (39) | 8 (10)                                               | 8 (10)  | 6 (8)   | 1 (1)   | 23 (29) |
| Hypertension                         | 3 (4)                                                                     | 8 (10)  | 17 (21) | 0       | 28 (35) | 1 (1)                                                | 4 (5)   | 13 (16) | 0       | 18 (23) |
| Fatigue                              | 17 (21)                                                                   | 7 (9)   | 1 (1)   | 0       | 25 (31) | 11 (14)                                              | 2 (3)   | 0       | 0       | 13 (16) |
| Thrombocytopenia                     | 9 (11)                                                                    | 6 (8)   | 4 (5)   | 2 (3)   | 21 (26) | 7 (9)                                                | 4 (5)   | 3 (4)   | 1 (1)   | 15 (19) |
| Nausea                               | 17 (21)                                                                   | 2 (3)   | 1 (1)   | 0       | 20 (25) | 4 (5)                                                | 1 (1)   | 0       | 0       | 5 (6)   |
| Pyrexia                              | 12 (15)                                                                   | 7 (9)   | 1 (1)   | 0       | 20 (25) | 2 (3)                                                | 3 (4)   | 1 (1)   | 0       | 6 (8)   |
| Rash                                 | 17 (21)                                                                   | 3 (4)   | 0       | 0       | 20 (25) | 13 (16)                                              | 2 (3)   | 0       | 0       | 15 (19) |
| Constipation                         | 12 (15)                                                                   | 3 (4)   | 2 (3)   | 0       | 17 (21) | 7 (9)                                                | 1 (1)   | 1 (1)   | 0       | 9 (11)  |
| Cough                                | 13 (16)                                                                   | 3 (4)   | 0       | 0       | 16 (20) | 1 (1)                                                | 0       | 0       | 0       | 1 (1)   |
| Urinary tract infection              | 2 (3)                                                                     | 13 (16) | 1 (1)   | 0       | 16 (20) | 0                                                    | 0       | 0       | 0       | 0       |
| Insomnia                             | 12 (15)                                                                   | 3 (4)   | 0       | 0       | 15 (19) | 1 (1)                                                | 0       | 0       | 0       | 1 (1)   |
| Oedema peripheral                    | 13 (16)                                                                   | 2 (3)   | 0       | 0       | 15 (19) | 8 (10)                                               | 1 (1)   | 0       | 0       | 9 (11)  |
| Headache                             | 11 (14)                                                                   | 0       | 3 (4)   | 0       | 14 (18) | 1 (1)                                                | 0       | 0       | 0       | 1 (1)   |
| Dizziness                            | 12 (15)                                                                   | 1 (1)   | 0       | 0       | 13 (16) | 4 (5)                                                | 0       | 0       | 0       | 4 (5)   |
| Dyspnoea                             | 7 (9)                                                                     | 2 (3)   | 3 (4)   | 1 (1)   | 13 (16) | 1 (1)                                                | 0       | 0       | 0       | 1 (1)   |
| Hyponatraemia                        | 4 (5)                                                                     | 0       | 8 (10)  | 1 (1)   | 13 (16) | 0                                                    | 0       | 1 (1)   | 0       | 1 (1)   |
| Decreased appetite                   | 7 (9)                                                                     | 5 (6)   | 0       | 0       | 12 (15) | 3 (4)                                                | 0       | 0       | 0       | 3 (4)   |
| Electrocardiogram QT prolonged       | 4 (5)                                                                     | 5 (6)   | 3 (4)   | 0       | 12 (15) | 3 (4)                                                | 4 (5)   | 2 (3)   | 0       | 9 (11)  |
| Hypomagnesaemia                      | 11 (14)                                                                   | 0       | 1 (1)   | 0       | 12 (15) | 4 (5)                                                | 0       | 1 (1)   | 0       | 5 (6)   |
| Vomiting                             | 10 (13)                                                                   | 2 (3)   | 0       | 0       | 12 (15) | 0                                                    | 0       | 0       | 0       | 0       |

<sup>a</sup> The adverse events listed here are those that occurred in  $\geq 15\%$  of patients with NSCLC and intracranial metastases at any grade level, independent of attribution.

<sup>b</sup> The relatedness of adverse events to treatment was determined by the investigators.
